# Supplementary material
Source: Research Square preprint supplement (doi:10.21203/rs.3.rs-10033401/v1)
Supplement: Supplementary file 1 [file 94c5feb3aba1b5b22db1e6f1.docx]

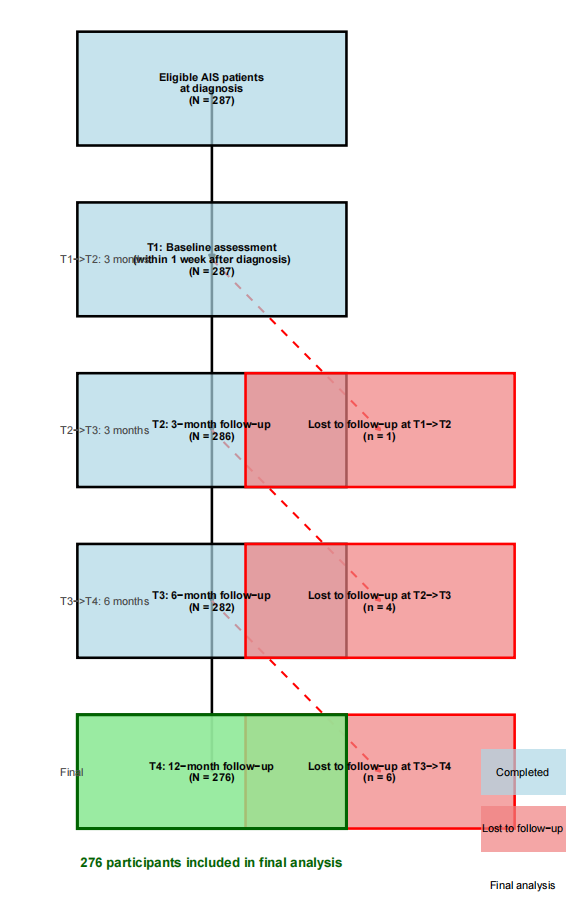


**Supplementary eFigure 1**. Flow chart from discharge to one-year follow-up at diagnosis

**Supplementary eTable 1.** Comparison of characteristics between patients included in the study and patients lost to follow-up

| **Variables** | **Item** | **Patients included in the study (n = 276)** | **Patients lost to follow-up (n = 11)** | ***P*** |
| --- | --- | --- | --- | --- |
| Gender | Man | 136 (49.3) | 5 (45.5) | 0.806 |
| Woman | 140 (50.7) | 6 (54.5) |
| Age | <12 year | 218 (79.0) | 7 (63.6) | 0.242 |
| ≥12 year | 58 (21.0) | 4 (36.4) |
| Education level | Primary school | 165 (59.8) | 6 (54.5) | 0.683 |
| Junior high school | 98 (35.5) | 5 (45.5) |
| High school or above | 13 (4.7) | 0 (0.0) |
| **Only-child status** | Yes | 169 (61.2) | 8 (72.7) | 0.438 |
| No | 107 (38.8) | 3 (27.3) |
| **Monthly household income per capita** | <5000 RMB | 74 (26.8) | 5 (45.5) | 0.346 |
| 5001-10000 RMB | 113 (40.9) | 3 (27.3) |
| >10000 RMB | 89 (32.2) | 3 (27.3) |
| Primary carer | Father | 85 (59.0) | 7 (63.6) | 0.629 |
| Mother | 48 (33.3) | 4 (36.4) |
| Others | 11 (7.6) | 0 (0.0) |
| Place of residence | Cities and towns | 61 (42.4) | 2 (18.2) | 0.106 |
| Village | 83 (57.6) | 9 (81.8) |
| Family genetic history | No | 125 (86.8) | 8 (72.7) | 0.190 |
| Yes | 19 (13.2) | 3 (27.3) |
| Combine other health conditions | No | 140 (97.2) | 10 (90.9) | 0.317 |
| Yes | 4 (2.8) | 1 (9.1) |
| Cobb angle (°) | 10-20 | 125 (45.3) | 6 (54.5) | 0.763 |
| 21-40 | 76 (27.5) | 2 (18.2) |
| 41-50 | 75 (27.3) | 3 (27.3) |
| Risser sign | 0~1 level | 54 (19.6) | 10 (14.4) | 0.728 |
| 2~3 level | 188 (68.1) | 1 (69.7) |
| 4~5 level | 75 (12.3) | 0 (15.9) |
| Therapy method | Observation + Splint treatment | 257 (93.1) | 10 (90.9) | 0.558 |
| Operative treatment | 19 (6.9) | 1 (9.1) |

**Supplementary eTable 2.**  Model Selection Criteria of the Growth Mixture Model (GMM) analysis

| **Class** | **LL** | **AIC** | **BIC** | | **aBIC** | **Entropy** | ***P* vaule** | | **Class probability** |
| --- | --- | --- | --- | --- | --- | --- | --- | --- | --- |
| **LMR** | **BLRT** |
| 1 | -3068.063 | 6156.125 | | 6192.329 | 6160.621 | - | - | - | - |
| 2 | -3013.516 | 6053.031 | | 6100.097 | 6058.876 | 0.955 | <0.001 | <0.001 | 0.54/0.45 |
| **3** | **-2918.450** | **5868.899** | | **5926.826** | **5876.092** | **0.986** | **0.001** | **<0.001** | **0.52/0.33/0.15** |
| 4 | -2887.280 | 5812.561 | | 5881.349 | 5821.103 | 0.984 | 0.114 | <0.001 | 0.03/0.33/0.15/0.49 |
| 5 | -2860.082 | 5764.163 | | 5843.812 | 5774.054 | 0.989 | 0.142 | <0.001 | 0.05/0.49/0.03/0.13/0.30 |

**Supplementary eTable 3.** Parameter estimates for the three-class model with free estimation

| **Means** |  | ***SE*** | ***t*  values** | ***P* values** |
| --- | --- | --- | --- | --- |
| **Class 1（n=144）** |  |  |  |  |
| Intercept | 23.075 | 0.312 | 74.032 | <0.001 |
| Slope | 0.610 | 0.041 | 14.881 | <0.001 |
| **Class 2（n=91）** |  |  |  |  |
| Intercept | 32.356 | 0.352 | 91.916 | <0.001 |
| Slope | 1.442 | 0.058 | 24.969 | <0.001 |
| **Class 3（n=41）** |  |  |  |  |
| Intercept | 46.582 | 0.577 | 80.684 | <0.001 |
| Slope | 1.074 | 0.097 | 11.129 | <0.001 |

## **Supplementary eFigure 2.** Variation within estimated trajectories

***Note:*** Class 1 = stable low-risk group; Class 2 = moderately increasing group; Class 3 = persistent high-risk group.
